# Supplementary material for: Mesopore engineering in Al-rich mordenite zeolites by a tandem top-down protocol: a comparative study between fluoride leaching and fluorination
Source: Royal Society of Chemistry journal article supplement (doi:10.1039/d2nj05635f), 2022-12-27
Supplement: d2nj05635f1.pdf [file d2nj05635f1.pdf]

## Supporting information

### **Mesopore Engineering in Al-Rich Mordenite Zeolites by Tandem Top-down Protocol: A Comparative Study between Fluoride Leaching and Fluorination**

Ning Wei,<sup>a,b,c</sup> Lulu Xu,<sup>a</sup> Huimin Gong,<sup>b</sup> Weiping Zhang,<sup>a,\*</sup> Dazhi Zhang<sup>b</sup> and Shengjun Huang<sup>b,\*</sup>

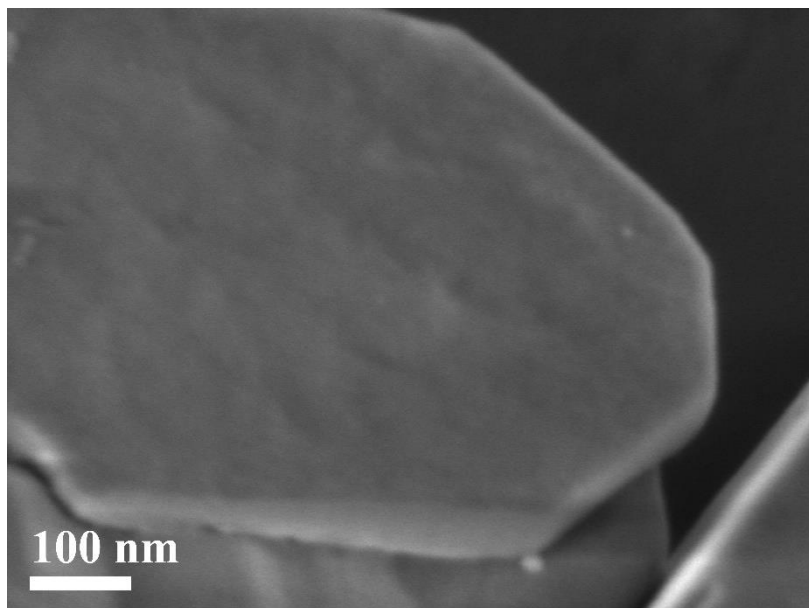

**Figure S1.** FESEM image of AT-HM sample

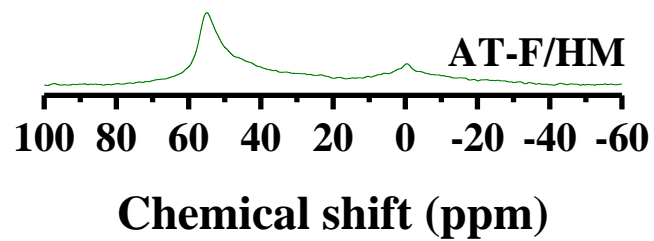

**Figure S2.**  $^{27}\text{Al}$  MAS NMR spectra of AT-F/HM sample
